# Supplementary material for: Serum lipidomics reveal the mechanism of memory disorder improvement by Qifu decoction
Source: Royal Society of Chemistry journal article supplement (doi:10.1039/d3ay00899a), 2023-01-01
Supplement: d3ay00899a1.pdf [file d3ay00899a1.pdf]

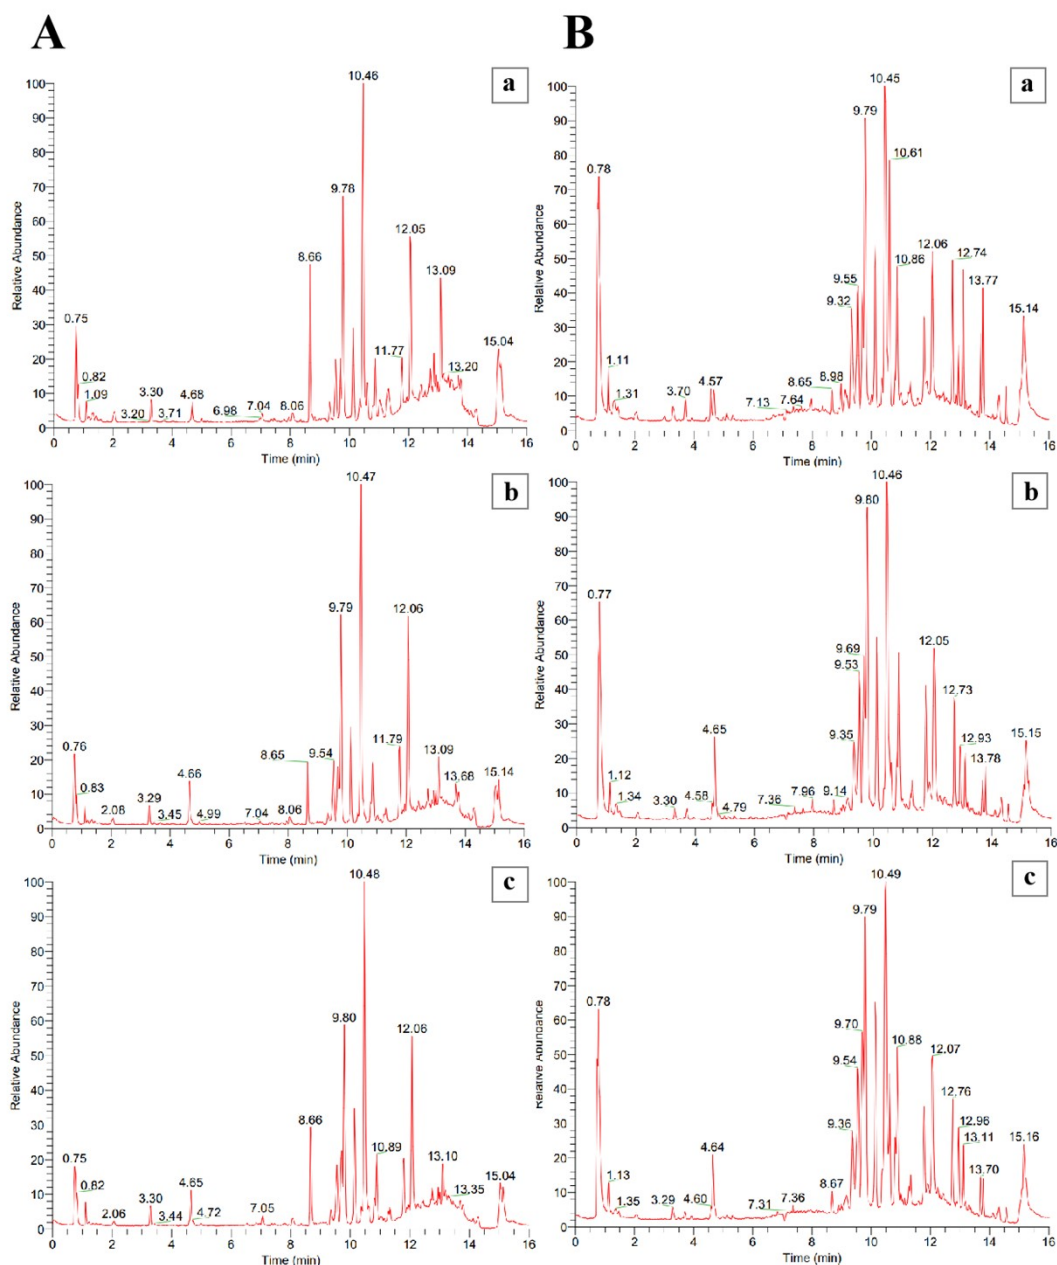

**Fig. 1.** Total ion current diagram of serum samples in control, model, QFDM groups and QC samples. (A) Positive ion mode. (B) Negative ion mode (a–d: control, model, middle-doses QFD groups, and QC samples, respectively).
